# Supplementary material
Source: PubMed Central journal article supplement (PMC3490104)
Supplement: NIHMS405740-supplement-1_si_001.pdf [file NIHMS405740-supplement-1_si_001.pdf]

**A coordination chemistry study of hydrated and solvated cationic vanadium ions in oxidation states +III, +IV, and +V in solution and solid state**

Joanna Krakowiak,<sup>a</sup> Daniel Lundberg, and Ingmar Persson\*

Department of Chemistry, Uppsala Biocenter, Swedish University of Agricultural Sciences, P.O. Box 7015, SE-750 07 Uppsala, Sweden,

<sup>a</sup> Current address: Department of Physical Chemistry, Technical University of Gdansk, ul. Narutowicza 11/12, PL-80952 Gdansk, Poland.

Supporting Material

**Table S1a. Vanadium(II) hydrates**

| Ref. or CSD/ICSD code(s) | avg. $d_{V-O}$ | Structure                                                            | $d_{V-O}/\text{\AA}$                                   | Comment                                                                                                                                       |
|--------------------------|----------------|----------------------------------------------------------------------|--------------------------------------------------------|-----------------------------------------------------------------------------------------------------------------------------------------------|
| VEPSUE 68779             | 2.118 \AA      | $[\text{V}(\text{H}_2\text{O})_6](\text{CF}_3\text{SO}_3)_2$         | 2·(2.118, 2.118, 2.119)                                | Only two distances listed!<br>Cotton, F. A.; Daniels, L. M.; Murillo, C. A.; Quesada, J. F. <i>Inorg. Chem.</i> , <b>1993</b> , 32, 4861-4867 |
| 66150                    | 2.121? \AA     | $(\text{ND}_4)_2[\text{V}(\text{D}_2\text{O})_6](\text{SO}_4)_2$     | 2·(2.113, 2.129, ???)                                  |                                                                                                                                               |
|                          | 2.125 \AA      | $[\text{V}(\text{H}_2\text{O})_6]\text{SiF}_6$                       | 6·2.125 \AA                                            |                                                                                                                                               |
| 75461                    | 2.129 \AA      | $[\text{V}(\text{H}_2\text{O})_6]\text{SO}_4\cdot\text{H}_2\text{O}$ | (2·(2.102, 2.134, 2.137) +<br>2·(2.118, 2.130, 2.151)) | X-ray data<br>Cotton, F. A.; Daniels, L. M.; Murillo, C. A.; Quesada, J. F. <i>Inorg. Chem.</i> , <b>1993</b> , 32, 4861-4867                 |
|                          | 2.129 \AA      | $(\text{NH}_4)_2[\text{V}(\text{H}_2\text{O})_6](\text{SO}_4)_2$     | 2·(2.116, 2.133, 2.135)                                |                                                                                                                                               |
| 61263                    | 2.131 \AA      | $[\text{V}(\text{H}_2\text{O})_6]\text{SO}_4$                        | (2·(2.123, 2.131, 2.136) +<br>2·(2.120, 2.124, 2.150)) | Neutron data                                                                                                                                  |
| 75462                    | 2.140 \AA      | $[\text{V}(\text{H}_2\text{O})_6]\text{SO}_4\cdot\text{H}_2\text{O}$ | (2·(2.115, 2.141, 2.150) +<br>2·(2.125, 2.139, 2.170)) |                                                                                                                                               |
| 14345                    | 2.148 \AA      | $[\text{V}(\text{H}_2\text{O})_6](\text{NH}_4)_2(\text{SO}_4)_2$     | 2·(2.118, 2.161, 2.164)                                |                                                                                                                                               |
| <b>Mean:</b>             |                | <b>2.130 \AA [8 structures]</b>                                      |                                                        |                                                                                                                                               |

Excluded structures (3): YEGSAF (more likely  $V^{3+}$ , see Table S2), 15232 (mixed  $V^{2+}/Ni^{2+}$ ), 66151 (mixed  $V^{2+}/Zn^{2+}$ )

**Table S1b. Vanadium(II) solvates**

| CSD          | ICSD | avg. $d_{V-O}$                  | Structure                                                                                               | $d_{V-O}/\text{\AA}$    | Comment     |
|--------------|------|---------------------------------|---------------------------------------------------------------------------------------------------------|-------------------------|-------------|
| SIJFAS       |      | 2.114 \AA                       | $[\text{V}(\text{CH}_3\text{COOH})_6]\text{Br}_2$                                                       | 2·(2.109, 2.113, 2.121) | acetic acid |
| DATBUV       |      | 2.140 \AA                       | $[\text{V}(\text{CH}_3\text{OH})_6]\text{Cl}_2$                                                         | 2·(2.133, 2.139, 2.147) | methanol    |
| SUJNUG       |      | 2.142 \AA                       | $[\text{V}(\text{OC}_4\text{H}_8)_6](\text{C}_{24}\text{BF}_{20})_2\cdot 2\text{C}_4\text{H}_8\text{O}$ | 2·(2.131, 2.147, 2.149) | thf         |
| <b>Mean:</b> |      | <b>2.132 \AA [3 structures]</b> |                                                                                                         |                         |             |

**Table S2a. Vanadin(III) hydrates**

| CSD      | ICSD         | avg. $d_{V-O}$ | Structure                                                                            | $d_{V-O}/\text{\AA}$    | Comment       |
|----------|--------------|----------------|--------------------------------------------------------------------------------------|-------------------------|---------------|
| FEMHOV   | 170206       | 1.990 Å        | $[\text{V}(\text{H}_2\text{O})_6](\text{C}(\text{NH}_2)_3)(\text{SO}_4)_2$           | 3·(1.987, 1.993)        |               |
|          | 81830        | 1.991 Å        | $\text{K}[\text{V}(\text{H}_2\text{O})_6](\text{SO}_4)_2 \cdot 6\text{H}_2\text{O}$  | 6·1.991                 |               |
|          | 81832        | 1.991 Å        | $\text{Cs}[\text{V}(\text{H}_2\text{O})_6](\text{SO}_4)_2 \cdot 6\text{H}_2\text{O}$ | 6·1.991                 |               |
|          | 96936        | 1.993 Å        | $\text{Cs}[\text{V}(\text{D}_2\text{O})_6](\text{SO}_4)_2 \cdot 6\text{D}_2\text{O}$ | 6·1.993                 | 10 K          |
|          | 201210       | 1.993 Å        | $\text{Cs}[\text{V}(\text{H}_2\text{O})_6](\text{SO}_4)_2 \cdot 6\text{H}_2\text{O}$ | 6·1.993                 |               |
| COLNUM01 | 201679       | 1.994 Å        | $[\text{V}(\text{H}_2\text{O})_6](\text{H}_5\text{O}_2)(\text{CF}_3\text{SO}_3)_4$   | 2·(1.978, 1.991, 2.013) | 10 K, neutron |
| COLNUM   | 201678       | 1.995 Å        | $[\text{V}(\text{H}_2\text{O})_6](\text{H}_5\text{O}_2)(\text{CF}_3\text{SO}_3)_4$   | 2·(1.988, 1.993, 2.003) | 295 K, X-ray  |
|          | 81831        | 1.996 Å        | $\text{Rb}[\text{V}(\text{H}_2\text{O})_6](\text{SO}_4)_2 \cdot 6\text{H}_2\text{O}$ | 6·1.996                 |               |
|          | 96936        | 1.996 Å        | $\text{Cs}[\text{V}(\text{D}_2\text{O})_6](\text{SO}_4)_2 \cdot 6\text{D}_2\text{O}$ | 6·1.996                 | 15 K          |
|          | 74004        | 2.007 Å        | $\text{Cs}[\text{V}(\text{H}_2\text{O})_6](\text{SO}_4)_2 \cdot 6\text{H}_2\text{O}$ | 6·2.007                 |               |
|          | <b>Mean:</b> | <b>1.995 Å</b> | <b>[10 structures]</b>                                                               |                         |               |

Excluded structures (1): YEGSAF (reported as  $V^{2+}$ , mean value at 1.958 Å)

**Table S2b. Vanadin(III) solvates**

| CSD      | ICSD         | avg. $d_{V-O}$ | Structure                                                                                       | $d_{V-O}/\text{\AA}$      | Comment                     |
|----------|--------------|----------------|-------------------------------------------------------------------------------------------------|---------------------------|-----------------------------|
| HURVTI01 |              | 1.935 Å        | $[\text{V}(\text{OC}(\text{NH}_2)_2)_6]\text{I}_3$                                              | 6·1.93 ( <i>in text</i> ) | urea, 90 K, 2.86 Å in CSD   |
| HURVTI   |              | 1.985 Å        | $[\text{V}(\text{OC}(\text{NH}_2)_2)_6]\text{I}_3$                                              | 6·1.98 ( <i>in text</i> ) | urea, 300 K, 2.96 Å in CSD  |
| PIZBIJ   |              | 2.027 Å        | $\text{Li}_3[\text{V}(\text{OC}_{12}\text{H}_{19}\text{O}_5)_6]\text{C}_6\text{H}_5\text{CH}_3$ | 2·(2.020, 2.028, 2.033)   | substituted glucanofuranose |
|          | <b>Mean:</b> | <b>1.982 Å</b> | <b>[3 structures]</b>                                                                           |                           |                             |

Excluded structures (6): VAACAC, VAACAC01, VAACAC02, VAACAC12, VAACAC13, VAACAC14 (all anionic)

**Table S3a. Vanadium(IV) hydrates**

| CSD    | ICSD         | $d_{V=O}/\text{\AA};$ | $d_{V-O_{\text{perp}}}/\text{\AA};$ | $d_{V-O_{\text{trans}}}/\text{\AA}$ | Structure                                                                                                                                                      | Comment |
|--------|--------------|-----------------------|-------------------------------------|-------------------------------------|----------------------------------------------------------------------------------------------------------------------------------------------------------------|---------|
|        | 51489        | 1.570;                | 2.030, 2.030, 2.030, 2.030;         | 2.210                               | [Na(H <sub>2</sub> O) <sub>2</sub> ] <sub>2</sub> [VO(H <sub>2</sub> O) <sub>5</sub> ][SiW <sub>12</sub> O <sub>40</sub> ] $\cdot$ 4H <sub>2</sub> O           |         |
| OBUZUH |              | 1.576;                | 2.028, 2.035, 2.036, 2.049;         | 2.171                               | [VO(H <sub>2</sub> O) <sub>5</sub> ](C <sub>7</sub> H <sub>5</sub> SO <sub>6</sub> ) $\cdot$ 2H <sub>2</sub> O                                                 |         |
| LEYMIL |              | 1.577;                | 2.007, 2.013, 2.023, 2.059;         | 2.177                               | [VO(H <sub>2</sub> O) <sub>5</sub> ][Cu <sub>2</sub> C <sub>16</sub> H <sub>14</sub> N <sub>8</sub> O <sub>13</sub> S <sub>3</sub> ] $\cdot$ 7H <sub>2</sub> O |         |
| SIBGEQ |              | 1.577;                | 2.026, 2.026, 2.028, 2.028;         | 2.175                               | [VO(H <sub>2</sub> O) <sub>5</sub> ](CF <sub>3</sub> SO <sub>3</sub> ) <sub>2</sub>                                                                            |         |
|        | 92978        | 1.582;                | 2.019, 2.019, 2.034, 2.034;         | 2.231                               | [VO(H <sub>2</sub> O) <sub>5</sub> ]SO <sub>4</sub>                                                                                                            |         |
|        | 8103         | 1.584;                | 1.993, 2.006, 2.008, 2.019;         | 2.182                               | [VO(H <sub>2</sub> O) <sub>5</sub> ]SO <sub>4</sub>                                                                                                            |         |
|        | 10433        | 1.586;                | 2.004, 2.021, 2.023, 2.029;         | 2.160                               | [VO(H <sub>2</sub> O) <sub>5</sub> ]SO <sub>4</sub> $\cdot$ H <sub>2</sub> O                                                                                   |         |
|        | 23308        | 1.591;                | 2.017, 2.017, 2.031, 2.031;         | 2.217                               | [VO(H <sub>2</sub> O) <sub>5</sub> ]SO <sub>4</sub>                                                                                                            |         |
|        | 69125        | 1.599;                | 2.010, 2.021, 2.024, 2.032;         | 2.161                               | [VO(H <sub>2</sub> O) <sub>5</sub> ]SO <sub>4</sub> $\cdot$ H <sub>2</sub> O                                                                                   |         |
|        | <b>Mean:</b> | <b>1.586 \AA</b>      | <b>2.024 \AA</b>                    | <b>2.189 \AA</b>                    | <b>[9 structures]</b>                                                                                                                                          |         |

Excluded structures: *WJKOI* (a.k.a. 99952; anionic), *XACTOK* (a.k.a. 151325; anionic), 15748 (anionic), 24839 (anionic), 40420 (anionic), 55332 (anionic)

**Table S3b. Vanadium(IV) solvates**

| CSD      | ICSD         | $d_{V=O}/\text{\AA};$ | $d_{V-O_{\text{perp}}}/\text{\AA};$ | $d_{V-O_{\text{trans}}}/\text{\AA}$ | Structure                                                                                                                                            | Comment |
|----------|--------------|-----------------------|-------------------------------------|-------------------------------------|------------------------------------------------------------------------------------------------------------------------------------------------------|---------|
|          | 39393        | 1.527;                | 1.996, 2.002, 2.005, 2.015;         | 2.190 \AA                           | [VO(OC(NH <sub>2</sub> ) <sub>2</sub> ) <sub>5</sub> ]Br <sub>2</sub> $\cdot$ OC(NH <sub>2</sub> ) <sub>2</sub> $\cdot$ HBr $\cdot$ H <sub>2</sub> O | urea    |
| VODMSO01 |              | 1.593;                | 2.022, 2.039, 2.042, 2.047;         | 2.191 \AA                           | [VO(OS(CH <sub>3</sub> ) <sub>2</sub> ) <sub>5</sub> ](ClO <sub>4</sub> ) <sub>2</sub>                                                               | dmso    |
| BAVCUW   |              | 1.603;                | 1.980, 2.020, 2.026, 2.034;         | 2.169 \AA                           | [VO(OS(CH <sub>3</sub> ) <sub>2</sub> ) <sub>5</sub> ]I <sub>2</sub>                                                                                 | dmso    |
| DMSVRE   |              | 1.610;                | 1.941, 2.028, 2.065, 2.084;         | 2.180 \AA                           | [VO(OS(CH <sub>3</sub> ) <sub>2</sub> ) <sub>5</sub> ](ReO <sub>4</sub> ) <sub>2</sub>                                                               | dmso    |
|          | <b>Mean:</b> | <b>1.583 \AA</b>      | <b>2.022 \AA</b>                    | <b>2.183 \AA</b>                    | <b>[4 structures]</b>                                                                                                                                |         |

Excluded structures (2): *VDMSOP10* (incorrect; no coord.) and *VODMSO* (no coord.)

Table S4a. Vanadium(V) hydrates

| CSD             | ICSD | $d_{V=O}/\text{\AA}$ ; | $d_{V-O_{\text{perp}}}/\text{\AA}$ ; | $d_{V-O_{\text{trans}}}/\text{\AA}$ | $\angle O=V=O/^\circ$ | Structure | Comment |
|-----------------|------|------------------------|--------------------------------------|-------------------------------------|-----------------------|-----------|---------|
| ~ none listed ~ |      |                        |                                      |                                     |                       |           |         |

Table S4b. Vanadium(V) solvates

| CSD    | ICSD | $d_{V=O}/\text{\AA}$ ; | $d_{V-O}/\text{\AA}$ | $\angle O=V=O/^\circ$ | Structure                                                  | Comment |
|--------|------|------------------------|----------------------|-----------------------|------------------------------------------------------------|---------|
| XOKNAN |      | 1.606, 1.621;          | 2.014, 2.019, 2.027  | 108.3                 | $[\text{VO}_2(\text{OPC}_{18}\text{H}_{15})_3]\text{Cl}_2$ |         |

Table S4c. Vanadium(V) anionic hydrates (CN = 5)

| CSD | ICSD         | $d_{V=O}/\text{\AA}$ ; | $d_{V-O}/\text{\AA}$            | $\angle O=V=O/^\circ$ | Structure                                                                     | Comment    |
|-----|--------------|------------------------|---------------------------------|-----------------------|-------------------------------------------------------------------------------|------------|
|     | 51784        | 1.592, 1.682;          | 1.917, 1.941, 2.002 +           | 108.1                 | $\text{K}_3(\text{VO}_2)_2(\text{PO}_4)(\text{HPO}_4)\cdot\text{H}_2\text{O}$ | <i>tbp</i> |
|     |              | 1.613, 1.645;          | 1.927, 1.999, 2.022             | 107.5                 |                                                                               |            |
|     | 166893       | 1.619, 1.640;          | 1.971, 2.014, 2.038             | 105.8                 | $\text{Na}(\text{VO}_2)(\text{IO}_3)_2\cdot 2\text{H}_2\text{O}$              | <i>tbp</i> |
|     | 51098        | 1.629, 1.632;          | 1.984, 1.995, 2.018             | 106.4                 | $\text{Ba}_2(\text{VO}_2)(\text{PO}_4)(\text{HPO}_4)\cdot\text{H}_2\text{O}$  | <i>tbp</i> |
|     | <b>Mean:</b> | <b>1.631 \AA</b>       | <b>1.986 \AA [3 structures]</b> |                       |                                                                               |            |

Excluded: 93843 (CN=5&6)

Table S4d. Vanadium(V) anionic hydrates (CN = 6)

| CSD | ICSD         | $d_{V=O}/\text{\AA}$ ; | $d_{V-O_{\text{perp}}}/\text{\AA}$ ; | $d_{V-O_{\text{trans}}}/\text{\AA}$ | $\angle O=V=O/^\circ$ | Structure                                                                                       | Comment |
|-----|--------------|------------------------|--------------------------------------|-------------------------------------|-----------------------|-------------------------------------------------------------------------------------------------|---------|
|     | 158951       | 1.573, 1.654;          | 1.993, 2.027;                        | 2.109, 2.256                        | 107.6                 | $\text{Rb}((\text{VO}_2)(\text{SO}_4)(\text{H}_2\text{O})_2)\cdot\text{H}_2\text{O}$            |         |
|     | 158948       | 1.588, 1.596;          | 1.985, 2.000;                        | 2.153, 2.311                        | 108.9                 | $\text{K}((\text{VO}_2)(\text{SO}_4)(\text{H}_2\text{O})_2)\cdot\text{H}_2\text{O}$             |         |
|     | 363          | 1.594, 1.682;          | 1.982, 2.037;                        | 2.094, 2.237                        | 104.8                 | $\text{VO}_2\text{IO}_3\cdot 2\text{H}_2\text{O}$                                               |         |
|     | 158950       | 1.605, 1.658;          | 2.004, 2.032;                        | 2.140, 2.287                        | 103.7                 | $\text{Tl}((\text{VO}_2)(\text{SO}_4)(\text{H}_2\text{O})_2)\cdot\text{H}_2\text{O}$            |         |
|     | 280295       | 1.621, 1.635;          | 2.003, 2.010;                        | 2.230, 2.255                        | 103.8                 | $(\text{NH}_4)_3(\text{VO}_2)(\text{SO}_4)_2\cdot 1.5\text{H}_2\text{O}$                        |         |
|     | 158949       | 1.637, 1.674;          | 2.061, 2.068;                        | 2.205, 2.273                        | 110.2                 | $\text{NH}_4((\text{VO}_2)(\text{SO}_4)(\text{H}_2\text{O})_2)\cdot\text{H}_2\text{O}$          |         |
|     | 410957       | 1.645, 1.656;          | 1.918, 1.955;                        | 2.191, 2.395                        | 103.0                 | $\text{Cd}(\text{VO}_2)(\text{PO}_4)\cdot\text{H}_2\text{O}$                                    |         |
|     | 416841       | 1.649, 1.655;          | 1.954, 1.963;                        | 2.163, 2.471                        | 103.3                 | $(\text{NH}_4)_4((\text{VO}_2)_2(\text{Te}_2\text{O}_8(\text{OH})_2))\cdot 2\text{H}_2\text{O}$ |         |
|     | <b>Mean:</b> | <b>1.632 \AA</b>       | <b>1.999 \AA</b>                     | <b>2.236 \AA [8 structures]</b>     |                       |                                                                                                 |         |

Excluded: 91845 (odd bond distribution), 93843 (CN=5&6), 109614 (odd bond distribution;  $V^{4+}$ ?), 109862 (odd bond distribution)

**Table S4e. Vanadium(V) anionic solvates (CN = 6)**

| CSD      | ICSD         | $d_{V=O}/\text{\AA}$ ; | $d_{V-O_{\text{perp}}}/\text{\AA}$ ; | $d_{V-O_{\text{trans}}}/\text{\AA}$ | $\angle O=V=O/^\circ$ | Structure                                                                                | Comment   |
|----------|--------------|------------------------|--------------------------------------|-------------------------------------|-----------------------|------------------------------------------------------------------------------------------|-----------|
| AOXOVA01 |              | 1.626, 1.667;          | 1.983, 2.027;                        | 2.186, 2.258                        | 103.8                 | $(\text{NH}_4)_3\text{VO}_2(\text{O}_2\text{C}_2\text{O}_2)\cdot 2\text{H}_2\text{O}$    | bidentate |
| KOXALV   | 109849       | 1.628, 1.638;          | 1.995, 2.009;                        | 2.158, 2.230                        | 104.3                 | $\text{K}_3(\text{O}_2\text{C}_2\text{O}_2)(\text{VO}_2)\cdot 3\text{H}_2\text{O}$       | bidentate |
| KOXALV01 | 109850       | 1.630, 1.643;          | 1.992, 2.014;                        | 2.165, 2.237                        | 104.3                 | $\text{K}_3(\text{O}_2\text{C}_2\text{O}_2)(\text{VO}_2)\cdot 3\text{H}_2\text{O}$       | bidentate |
| AOXOVA   |              | 1.634, 1.648;          | 1.973, 1.988;                        | 2.184, 2.235                        | 103.8                 | $(\text{NH}_4)_3\text{VO}_2(\text{O}_2\text{C}_2\text{O}_2)\cdot 2\text{H}_2\text{O}$    | bidentate |
| OJEHOB   |              | 1.641, 1.641;          | 1.977, 1.977;                        | 2.181, 2.181                        | 104.4                 | $(\text{NH}_4)(\text{C}_5\text{H}_4\text{NO}_3)_2(\text{VO}_2)\cdot 3\text{H}_2\text{O}$ | bidentate |
|          | <b>Mean:</b> | <b>1.640 \AA</b>       | <b>1.994 \AA</b>                     | <b>2.202 \AA [5 structures]</b>     |                       |                                                                                          |           |

*Excluded: DAQSET, (strained bidentate), FAPJEL (strained bidentate)*

**Table S5a** – Selected bond distances in Å for **1**.

|          |            |
|----------|------------|
| V1-O1    | 1.569(3)   |
| V1-O11   | 2.0304(19) |
| V1-O11_c | 2.0304(19) |
| V1-O12   | 2.023(2)   |
| V1-O12_c | 2.023(2)   |
| V1-O13   | 2.183(3)   |
| S2-O21   | 1.432(2)   |
| S2-O22   | 1.440(3)   |
| S2-C2    | 1.812(8)   |
| C2-F21   | 1.305(8)   |
| C2-F22   | 1.264(5)   |
| S3-O31   | 1.4480(18) |
| S3-O32   | 1.424(3)   |
| S3-C3    | 1.830(5)   |
| C3-F31   | 1.311(3)   |
| C3-F32   | 1.309(5)   |

**Table S5b** – Selected bond angles in degrees for **1**.

|                |            |
|----------------|------------|
| O1-V1-O11      | 99.38(10)  |
| O1-V1-O11_c    | 99.38(10)  |
| O1-V1-O12      | 96.67(10)  |
| O1-V1-O12_c    | 96.67(10)  |
| O1-V1-O13      | 175.11(14) |
| O11-V1-O11_c   | 88.48(8)   |
| O11-V1-O12     | 87.68(8)   |
| O11-V1-O12_c   | 163.90(9)  |
| O11-V1-O13     | 84.09(8)   |
| O11_c-V1-O13   | 84.09(8)   |
| O11_c-V1-O12   | 163.90(9)  |
| O11_c-V1-O12_c | 87.68(8)   |
| O12-V1-O12_c   | 91.71(9)   |
| O12-V1-O13     | 79.96(8)   |
| O12_c-V1-O13   | 79.96(8)   |

**Table S6a** – Selected bond distances in Å for **2a**.

|         |           |
|---------|-----------|
| V1-O6   | 1.575(5)  |
| V1-O1   | 1.999(5)  |
| V1-O2   | 2.010(5)  |
| V1-O3   | 2.009(6)  |
| V1-O4   | 2.021(5)  |
| V1-O5   | 2.166(5)  |
| O1-S1   | 1.521(5)  |
| S1-C11  | 1.780(10) |
| S1-C12  | 1.748(9)  |
| O2-S2   | 1.528(5)  |
| S2-C21  | 1.731(10) |
| S2-C22  | 1.749(10) |
| O3-S3A  | 1.397(7)  |
| S3A-C31 | 1.792(12) |
| S3A-C32 | 1.711(11) |
| O3-S3B  | 1.381(7)  |
| S3B-C31 | 1.813(11) |
| S3B-C32 | 1.624(12) |
| O4-S4   | 1.481(5)  |
| S4-C41  | 1.715(10) |
| S4-C42  | 1.738(13) |
| O5-S5   | 1.490(5)  |
| S5-C51  | 1.777(10) |
| S5-C52  | 1.777(11) |

**Table S6b** – Selected bond angles in degrees for **2a**.

|           |          |
|-----------|----------|
| O6-V1-O1  | 97.9(2)  |
| O6-V1-O2  | 98.4(3)  |
| O6-V1-O3  | 96.6(3)  |
| O6-V1-O4  | 97.3(2)  |
| O6-V1-O5  | 178.2(3) |
| O1-V1-O2  | 88.2(2)  |
| O1-V1-O3  | 90.2(2)  |
| O1-V1-O4  | 164.8(2) |
| O1-V1-O5  | 83.8(2)  |
| O2-V1-O3  | 165.0(2) |
| O2-V1-O4  | 89.6(2)  |
| O2-V1-O5  | 81.3(2)  |
| O3-V1-O4  | 88.1(2)  |
| O3-V1-O5  | 83.8(2)  |
| O4-V1-O5  | 81.0(2)  |
| V1-O1-S1  | 124.9(3) |
| V1-O2-S2  | 124.3(3) |
| V1-O3-S3A | 132.9(4) |
| V1-O3-S3B | 137.7(4) |
| V1-O4-S4  | 127.1(3) |
| V1-O5-S5  | 129.7(3) |



**Table S7a** – Selected bond distances in Å for **3**.

|        |           |
|--------|-----------|
| V1-O10 | 1.577(5)  |
| V1-O1  | 1.959(4)  |
| V1-O2  | 1.964(4)  |
| V1-O3  | 1.975(5)  |
| V1-O4  | 1.984(4)  |
| V2-O20 | 1.570(5)  |
| V2-O5  | 1.961(4)  |
| V2-O6  | 1.995(5)  |
| V2-O7  | 1.956(4)  |
| V2-O8  | 1.955(5)  |
| O1-C1  | 1.285(9)  |
| O2-C2  | 1.277(8)  |
| O3-C3  | 1.275(9)  |
| O4-C4  | 1.271(8)  |
| O5-C5  | 1.277(7)  |
| O6-C6  | 1.267(9)  |
| O7-C7  | 1.275(8)  |
| O8-C8  | 1.286(10) |
| C1-N11 | 1.333(10) |
| C1-N12 | 1.324(11) |
| C2-N21 | 1.314(10) |
| C2-N22 | 1.321(10) |
| C3-N31 | 1.321(10) |
| C3-N32 | 1.337(9)  |
| C4-N41 | 1.360(9)  |
| C4-N42 | 1.303(9)  |
| C5-N51 | 1.321(9)  |
| C5-N52 | 1.336(10) |
| C6-N61 | 1.324(10) |
| C6-N62 | 1.341(10) |
| C7-N71 | 1.334(8)  |
| C7-N72 | 1.326(8)  |
| C8-N81 | 1.316(13) |
| C8-N82 | 1.349(11) |

**Table S7b** – Selected bond angles in degrees for **3**.

|           |           |
|-----------|-----------|
| O10-V1-O1 | 109.5(2)  |
| O10-V1-O2 | 105.1(2)  |
| O10-V1-O3 | 108.3(2)  |
| O10-V1-O4 | 104.2(2)  |
| O1-V1-O2  | 86.13(17) |
| O1-V1-O3  | 142.1(2)  |
| O1-V1-O4  | 84.63(18) |
| O2-V1-O3  | 85.29(18) |
| O2-V1-O4  | 150.7(2)  |
| O3-V1-O4  | 85.13(18) |
| O20-V2-O5 | 107.3(2)  |
| O20-V2-O6 | 105.1(2)  |
| O20-V2-O7 | 108.0(2)  |
| O20-V2-O8 | 106.6(2)  |
| O5-V2-O6  | 85.51(18) |
| O5-V2-O7  | 144.8(2)  |
| O5-V2-O8  | 85.25(18) |
| O6-V2-O7  | 86.02(18) |
| O6-V2-O8  | 148.3(2)  |
| O7-V2-O8  | 84.30(17) |
| V1-O1-C1  | 136.7(4)  |
| V1-O2-C2  | 136.6(5)  |
| V1-O3-C3  | 136.7(4)  |
| V1-O4-C4  | 135.4(4)  |
| V2-O5-C5  | 136.2(5)  |
| V2-O6-C6  | 135.1(4)  |
| V2-O7-C7  | 137.9(4)  |
| V2-O8-C8  | 131.8(4)  |

**Table S8a** – Selected bond distances in Å for **5**.

|           |           |
|-----------|-----------|
| V1-O11    | 1.594(6)  |
| V1-O12    | 1.591(5)  |
| V1-O13    | 2.048(11) |
| V1-O13B   | 2.040(12) |
| V1-O14    | 2.206(5)  |
| V1-O15    | 2.202(6)  |
| V1-O16    | 1.985(11) |
| V1-O16B   | 1.998(13) |
| O13-S13   | 1.521(12) |
| S13-C131  | 1.748(8)  |
| S13-C132  | 1.815(9)  |
| O13B-S13B | 1.537(13) |
| S13B-C131 | 1.734(9)  |
| S13B-C132 | 1.811(9)  |
| O14-S14   | 1.490(6)  |
| S14-C141  | 1.779(7)  |
| S14-C142  | 1.741(9)  |
| O15-S15   | 1.505(5)  |
| S15-C152  | 1.755(10) |
| S15-C151  | 1.745(9)  |
| O16-S16   | 1.531(12) |
| S16-C161  | 1.764(8)  |
| S16-C162  | 1.832(10) |
| O16B-S16B | 1.541(13) |
| S16B-C161 | 1.758(8)  |
| S16B-C162 | 1.828(10) |

**Table S8b** – Selected bond angles in degrees for **5**.

|              |          |
|--------------|----------|
| O11-V1-O12   | 104.0(3) |
| O11-V1-O13   | 106.3(4) |
| O11-V1-O13B  | 84.0(4)  |
| O11-V1-O14   | 92.2(2)  |
| O11-V1-O15   | 164.9(2) |
| O11-V1-O16   | 85.6(4)  |
| O11-V1-O16B  | 108.3(4) |
| O12-V1-O13   | 83.4(4)  |
| O12-V1-O13B  | 108.8(4) |
| O12-V1-O14   | 163.7(3) |
| O12-V1-O15   | 91.1(3)  |
| O12-V1-O16   | 105.3(4) |
| O12-V1-O16B  | 86.3(4)  |
| O12-V1-O16B  | 86.3(4)  |
| O13-V1-O14   | 90.8(4)  |
| O13-V1-O15   | 75.5(3)  |
| O13-V1-O15   | 75.5(3)  |
| O13-V1-O16   | 163.3(4) |
| O13B-V1-O14  | 71.1(4)  |
| O13B-V1-O15  | 91.7(4)  |
| O13B-V1-O16B | 158.1(5) |
| O14-V1-O15   | 72.7(2)  |
| O14-V1-O16   | 76.9(4)  |
| O14-V1-O16B  | 90.0(4)  |
| O15-V1-O16   | 89.9(3)  |
| O15-V1-O16B  | 71.7(4)  |

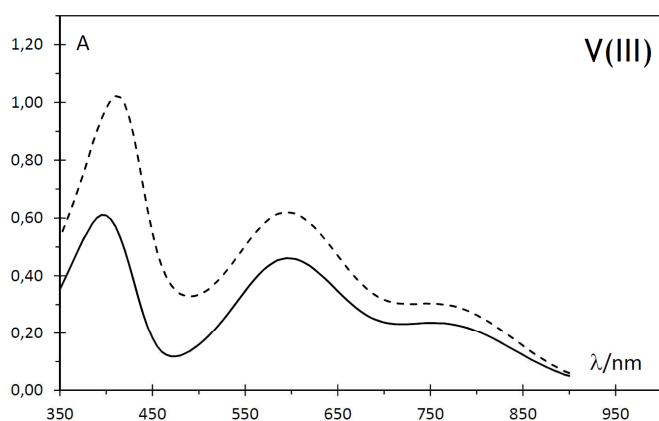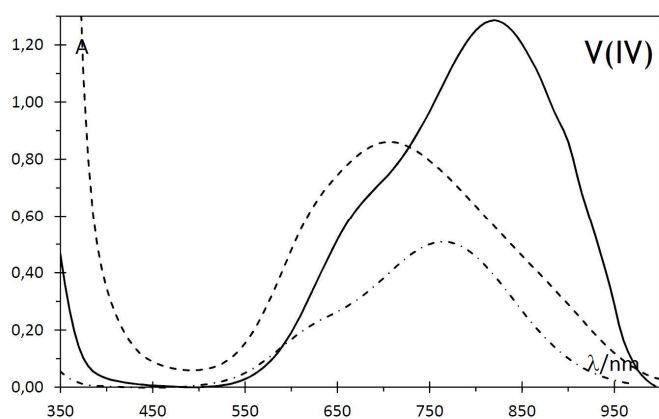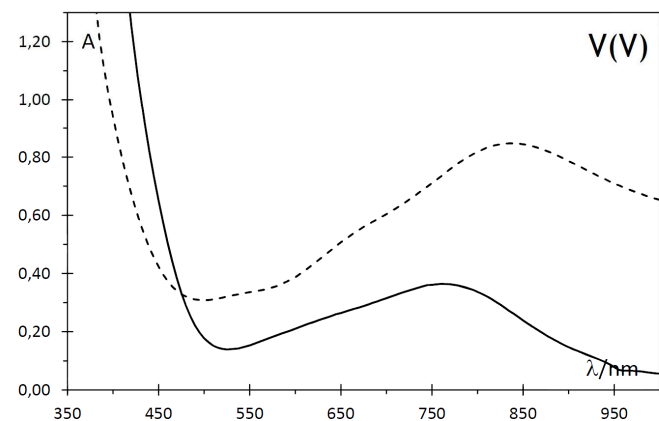

**Figure S1.** UV-Vis spectra of the studied vanadium solutions. (top) vanadium(III) in water at pH=0.60 (**L0**, solid line) and pH=1.22 (dashed line, **L0<sub>hyd</sub>**), the solutions are diluted ca. 5 times,  $c_V = 0.1 \text{ mol}\cdot\text{dm}^{-3}$ ; (middle) vanadium(IV) in water (dot dashed line, **L1a**), dmsO (solid line, **L2a**) and dmpu (dashed line, **L3**), the solutions are diluted ca. 25 times; and (bottom) vanadium(V) in water (solid line, **L4b**) and dmsO (dashed line, **L5a**), the solutions are diluted ca. 100 times.

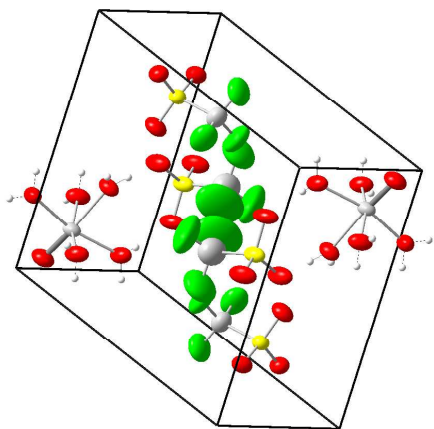

**Figure S2.** Representation of the unit cell for **1**. Thermal ellipsoids are set at 30 % probability.

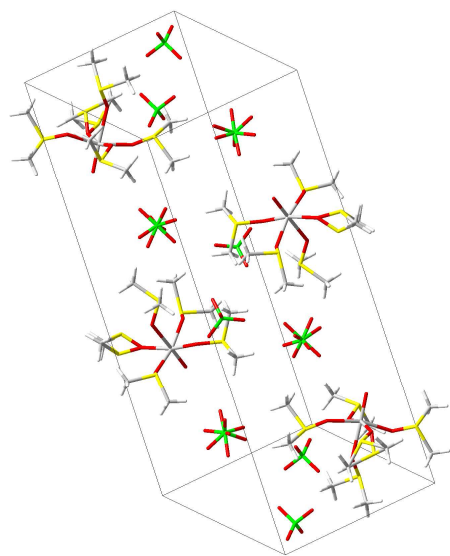

**Figure S3.** Representation of the unit cell for **2a**. The alternative positions for the disordered perchlorate ions are represented as shown.

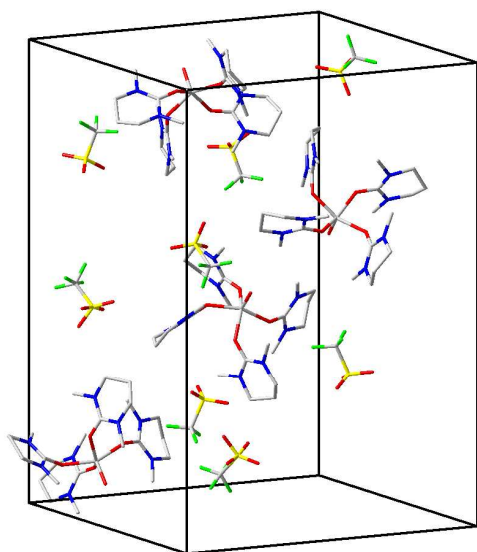

**Figure S4.** Representation of the unit cell for **3**.

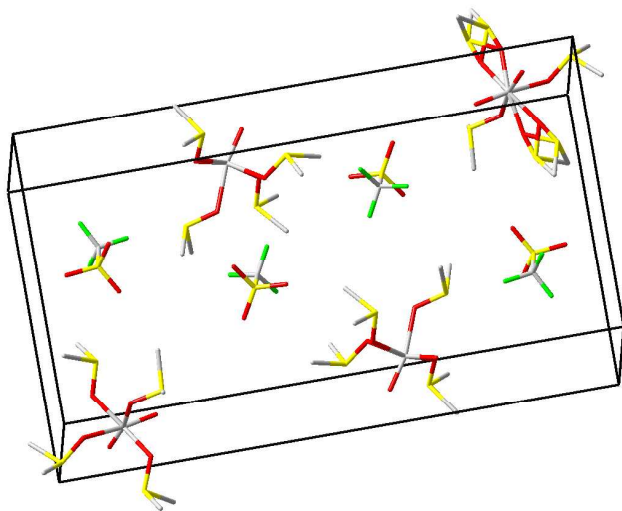

**Figure S5.** Representation of the unit cell for **5**. The alternative positions for the equatorial dmsol molecules are only shown on one of the complexes.

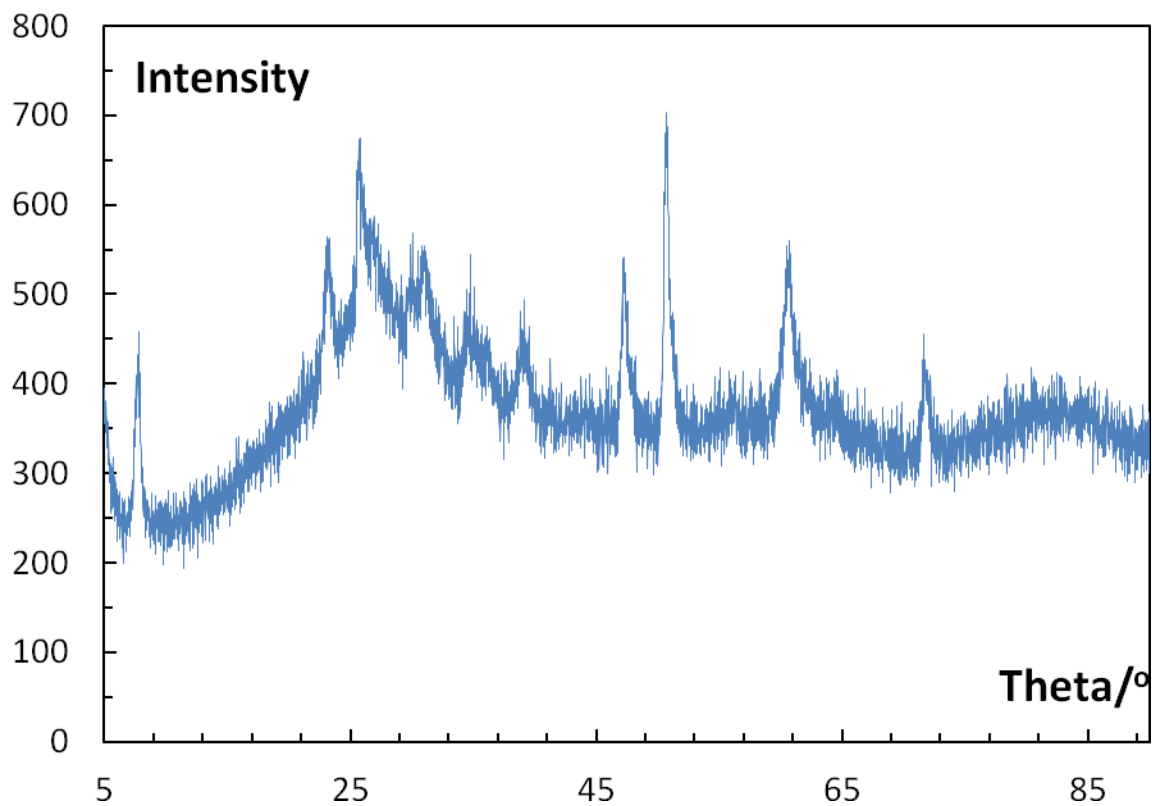

**Figure S6.** Powder diffraction data of dioxovanadium(V) perchlorate.
